# Supplementary material for: A Network Approach to Predict Pathogenic Genes for Fusarium graminearum
Source: PubMed Central journal article supplement (PMC2949387; doi:10.1371/journal.pone.0013021), 2010-10-04
Supplement: pone.0013021.s002.pdf [file pone.0013021.s002.pdf]

## **Table S1 - Pathogenic network modules**

Network modules consist of differentially expressed genes that intensely interact with each other. The functions of the genes in the modules were downloaded from MIPS FGDB, and the known pathogenic genes were marked in bold.

| Network modules | Genes                                            | MIPS annotations                                                                               |
|-----------------|--------------------------------------------------|------------------------------------------------------------------------------------------------|
| Module one      | <b>FGSG_04104</b>                                | probable guanine nucleotide-binding protein beta subunit                                       |
|                 | <b>FGSG_05535</b>                                | probable G protein alpha chain                                                                 |
|                 | <b>FGSG_09614</b>                                | probable G protein alpha subunit GNA-3                                                         |
|                 | FGSG_09271                                       | probable SEC13 - protein transport protein                                                     |
|                 | FGSG_05698                                       | probable WD40-repeat protein (notchless protein)                                               |
|                 | FGSG_09870                                       | probable CPC2 protein                                                                          |
|                 | FGSG_09988                                       | probable G protein alpha chain                                                                 |
|                 | FGSG_10251                                       | probable LST8 protein                                                                          |
|                 | FGSG_02648                                       | probable U5 snRNP-specific 40 kD protein (novel WD-40 repeat protein)                          |
| FGSG_05038      | probable nuclear migration protein               |                                                                                                |
| Module two      | <b>FGSG_06385</b>                                | pathogenicity MAP kinase 1                                                                     |
|                 | <b>FGSG_10313</b>                                | MAP kinase                                                                                     |
|                 | <b>FGSG_09903</b>                                | probable MAP kinase kinase                                                                     |
|                 | <b>FGSG_09612</b>                                | probable osmotic sensitive-2 protein (putative mitogen-activated protein (MAP) kinase homolog) |
|                 | FGSG_10066                                       | probable casein kinase I CKI2                                                                  |
|                 | FGSG_00337                                       | probable calmodulin-dependent protein kinase related to cyclin-dependent kinase chain SRB10    |
|                 | FGSG_04484                                       | related to cyclin-dependent kinase chain SRB10                                                 |
|                 | FGSG_00760                                       | related to single-stranded DNA binding protein                                                 |
|                 | FGSG_08906                                       | related to serine/threonine-specific protein kinase                                            |
|                 | FGSG_11878                                       | probable cutinase negative acting protein                                                      |
|                 | FGSG_11064                                       | related to glycine-rich RNA-binding protein                                                    |
|                 | FGSG_08468                                       | probable CDC28 - cyclin-dependent protein kinase                                               |
|                 | FGSG_08607                                       | probable casein kinase II beta subunit CKB1                                                    |
|                 | FGSG_00677                                       | probable protein kinase CK2 catalytic subunit CK2 alpha-3                                      |
|                 | FGSG_01338                                       | related to 26s proteasome subunit p28                                                          |
|                 | FGSG_00786                                       | related to serine/threonine-protein kinase                                                     |
|                 | FGSG_07295                                       | probable MAP kinase kinase                                                                     |
|                 | FGSG_02488                                       | related to Dis1-suppressing protein kinase DSK1                                                |
|                 | FGSG_12149                                       | probable serine/threonine-specific kinase KSP1                                                 |
|                 | FGSG_01288                                       | probable casein kinase II beta subunit (regulator of circadian clock protein FRQ)              |
|                 | FGSG_04286                                       | related to small nuclear ribonucleoprotein snRNP U1A                                           |
|                 | FGSG_08731                                       | probable casein kinase-1 HHP1                                                                  |
|                 | FGSG_07423                                       | probable cyclin-dependent ser/thr protein kinase KIN28                                         |
|                 | FGSG_07409                                       | related to cyclin dependent kinase C                                                           |
|                 | FGSG_08729                                       | related to cAMP-dependent protein kinase catalytic subunit                                     |
|                 | FGSG_06266                                       | related to cyclophilin                                                                         |
|                 | FGSG_09690                                       | probable peptidylprolyl isomerase (FK506-binding protein homolog)                              |
|                 | FGSG_06878                                       | probable CMK1 - Ca <sup>2+</sup> /calmodulin-dependent ser/thr protein kinase type I           |
|                 | FGSG_07855                                       | probable CDC7 - protein kinase                                                                 |
|                 | FGSG_05393                                       | probable PHO85 - cyclin-dependent protein kinase                                               |
|                 | FGSG_07329                                       | probable glycogen synthase kinase 3 alpha                                                      |
|                 | FGSG_04054                                       | related to VHS1 - protein kinase involved in G1/S transition                                   |
|                 | FGSG_04910                                       | probable cyclin-dependent kinases regulatory subunit CKS1                                      |
| FGSG_00536      | conserved hypothetical protein                   |                                                                                                |
| FGSG_03132      | probable CDC28 - cyclin-dependent protein kinase |                                                                                                |
| FGSG_05737      | related to polyadenylate-binding protein         |                                                                                                |
